# Supplementary material for: On the effect of particle surface chemistry in film stratification and morphology regulation
Source: Royal Society of Chemistry journal article supplement (doi:10.1039/d0sm00317d), 2020-01-01
Supplement: d0sm00317d1.pdf [file d0sm00317d1.pdf]

## Electronical Supporting Information

### On the effect of particle surface chemistry in film stratification and morphology regulation

Archana Samanta<sup>a</sup>, Romain Bordes<sup>a</sup>

<sup>a</sup>Department of Chemistry and Chemical Engineering, Applied Chemistry, Chalmers University of Technology, Sweden.

Table S1. Number of particles of silica and binders and their relative ratios against various silica content in the formulations.

| Silica wt. % | No. of silica particles | No. of binder particles | Ratio of number of silica particles to the number of binder particle |                                                                                                                           |
|--------------|-------------------------|-------------------------|----------------------------------------------------------------------|---------------------------------------------------------------------------------------------------------------------------|
| 10           | 1,29E+15                | 5,93E+13                | 22                                                                   | Number of silica particles per droplet of binder = (surface area of one binder particle/area of one silica particle) =198 |
| 20           | 2,57E+15                | 5,27E+13                | 49                                                                   |                                                                                                                           |
| 30           | 3,86E+15                | 4,61E+13                | 84                                                                   |                                                                                                                           |
| 40           | 5,15E+15                | 3,95E+13                | 130                                                                  |                                                                                                                           |
| 50           | 6,43E+15                | 3,29E+13                | 195                                                                  |                                                                                                                           |
| 60           | 7,72E+15                | 2,63E+13                | 293                                                                  |                                                                                                                           |
| 70           | 9,01E+15                | 1,98E+13                | 456                                                                  |                                                                                                                           |
| 80           | 1,03E+16                | 1,32E+13                | 781                                                                  |                                                                                                                           |
| 90           | 1,16E+16                | 6,59E+12                | 1758                                                                 |                                                                                                                           |
| 100          | 1,29E+16                | 0,00E+00                | --                                                                   |                                                                                                                           |

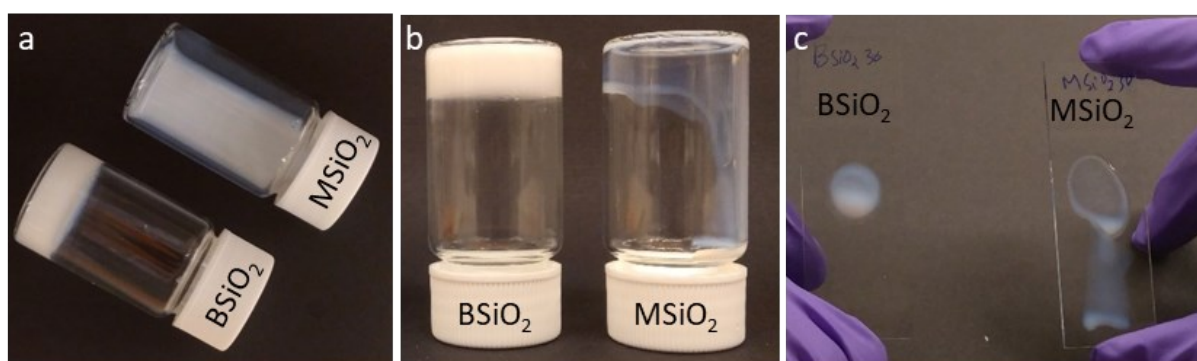

Figure 1S. Gelation tendencies of a 30 wt.% total dry solid content formulation was made with 20 wt.% silica ( $M_{SiO_2}$  or  $B_{SiO_2}$ ) and 80 wt.% binder (B1). a) and b) The In absence of any external electrolytes the bare silica sample gelled after 7 days whereas the modified silica formulation retained its flowability. c) A drop of 150  $\mu$ l from each of the formulation was allowed to stand on a glass slide for 10 minutes and then was tilted to an angle of 45°. The bare silica sample was resistant to flowability compared to modified silica sample at 20°C, indicating its early gelation tendencies.

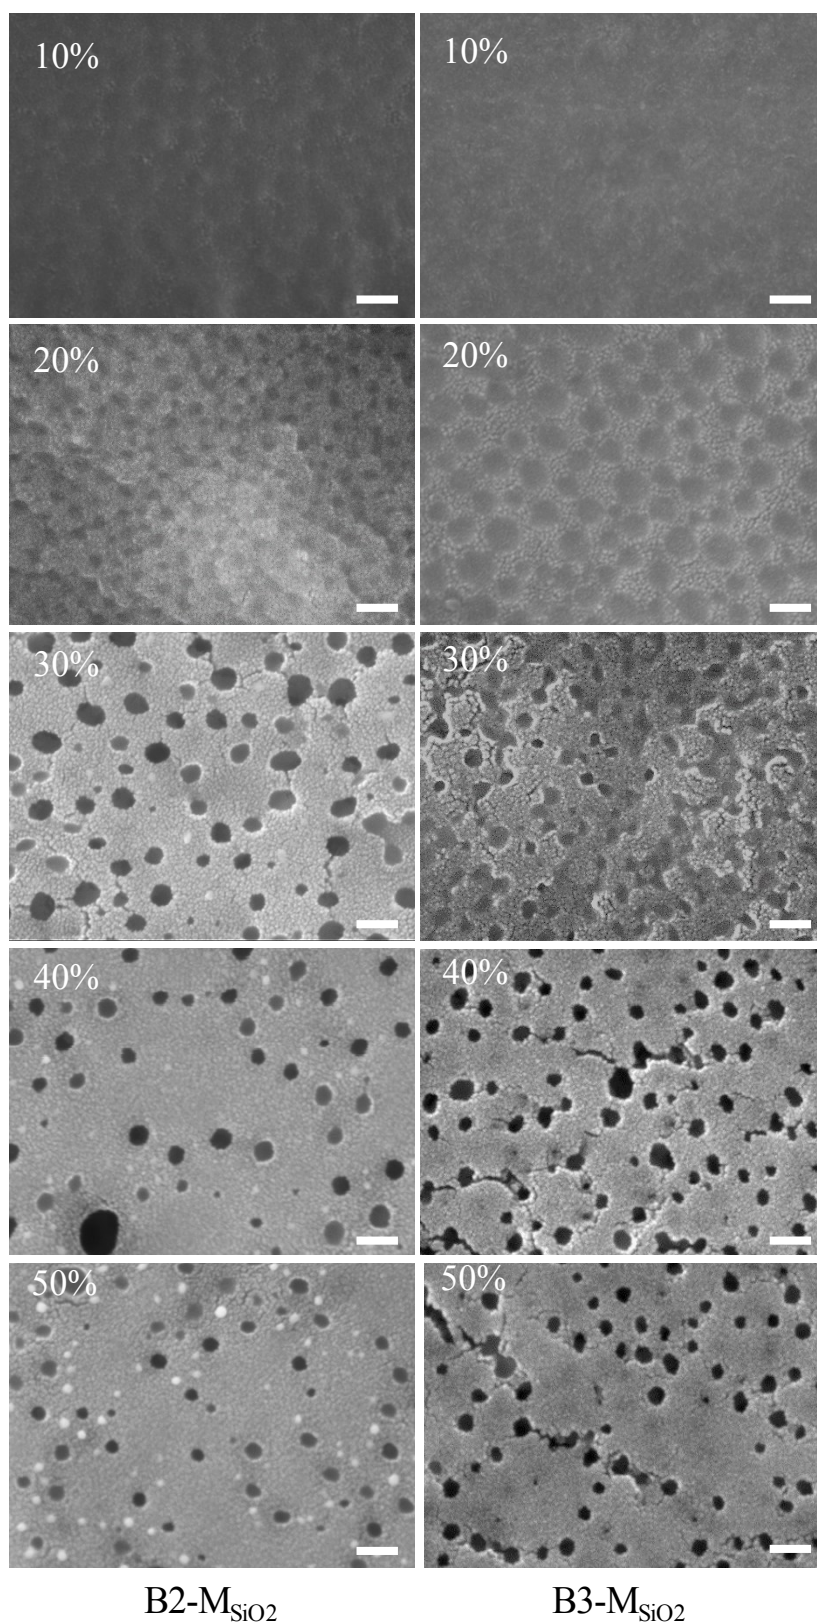

Figure 2S. Surface morphology of  $B2-M_{SiO_2}$  and  $B3-M_{SiO_2}$  films with total solid content of 5 wt%, dried at room temperature. The % value indicates the silica mass fractions. The white bar indicates a scale of 100nm
